# Supplementary material for: Anion recognition and anion-mediated self-assembly with thiourea-functionalised fused [3]polynorbornyl frameworks
Source: Royal Society of Chemistry journal article supplement (doi:10.1039/b703208k), 2007-01-01
Supplement: b703208k.pdf [file b703208k.pdf]

## Supplementary Information

### Anion recognition and anion mediated self assembly with thiourea functionalised fused [3]polynorbornyl frameworks

Frederick M Pfeffer, Paul E. Kruger and Thorfinnur Gunnlaugsson

Fluoride:Host interactions during titration

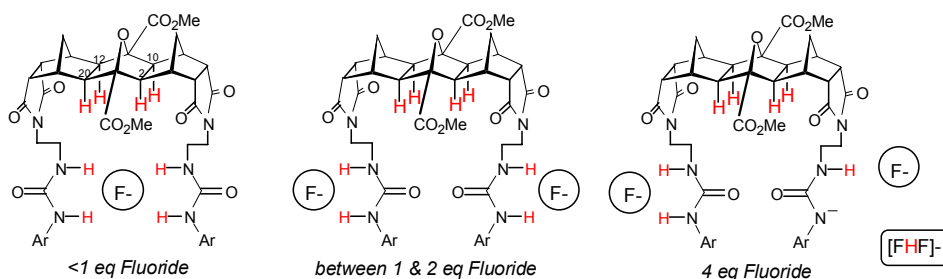

Titration curve for dihydrogen phosphate (monitoring the 'cleft' C-H resonances)

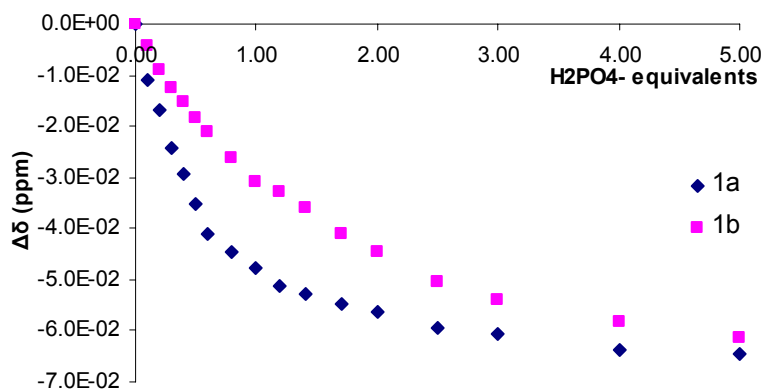

### Fit Plots

points are experimentally determined, line is theoretical fit for 1:2 host:guest model using WinEQNMR<sup>1</sup>

#### 1a against Acetate 1:2 model

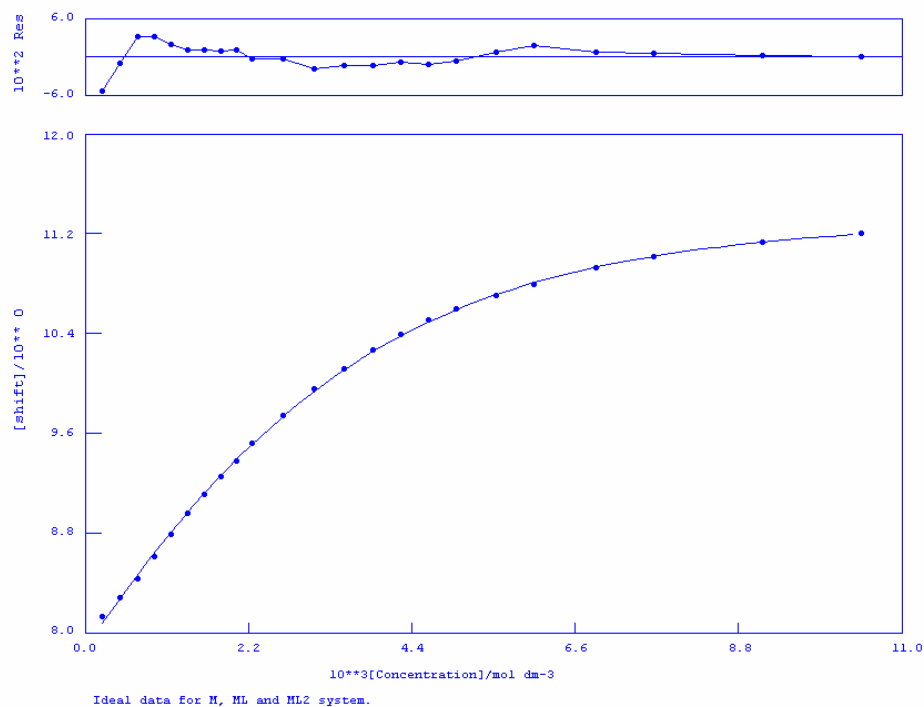

#### 1b against Acetate 1:2 model

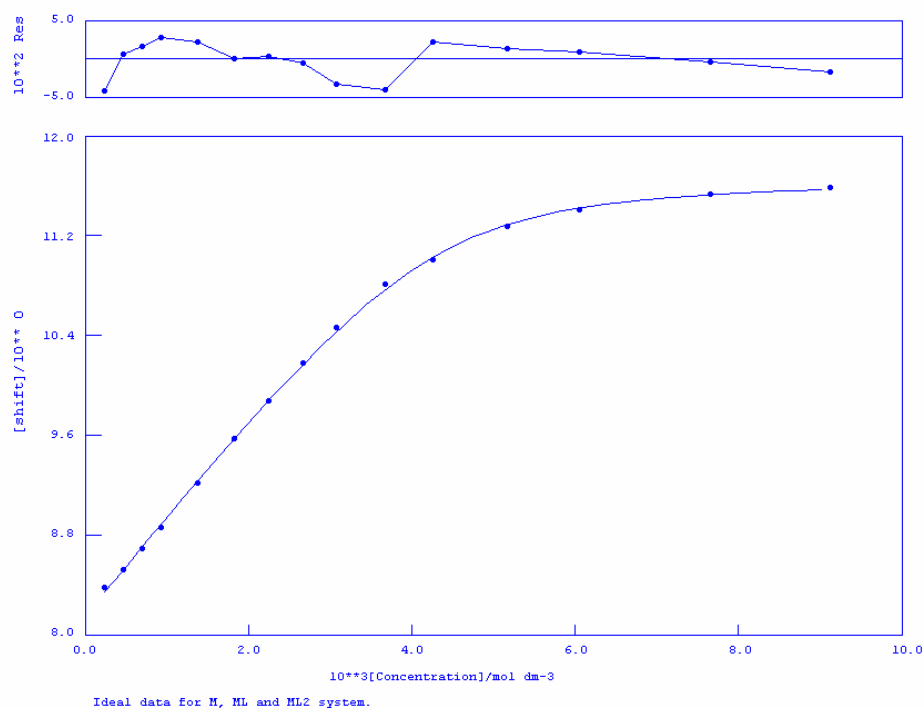

**2** against Acetate 1:2 model

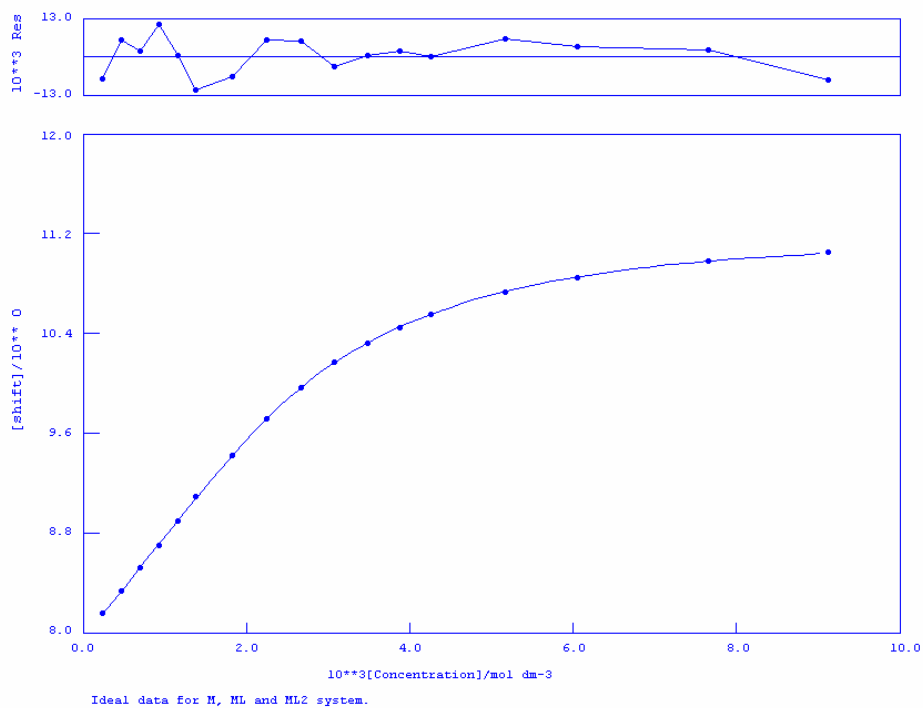

**1a** against  $\text{H}_2\text{PO}_4^-$  1:1 model

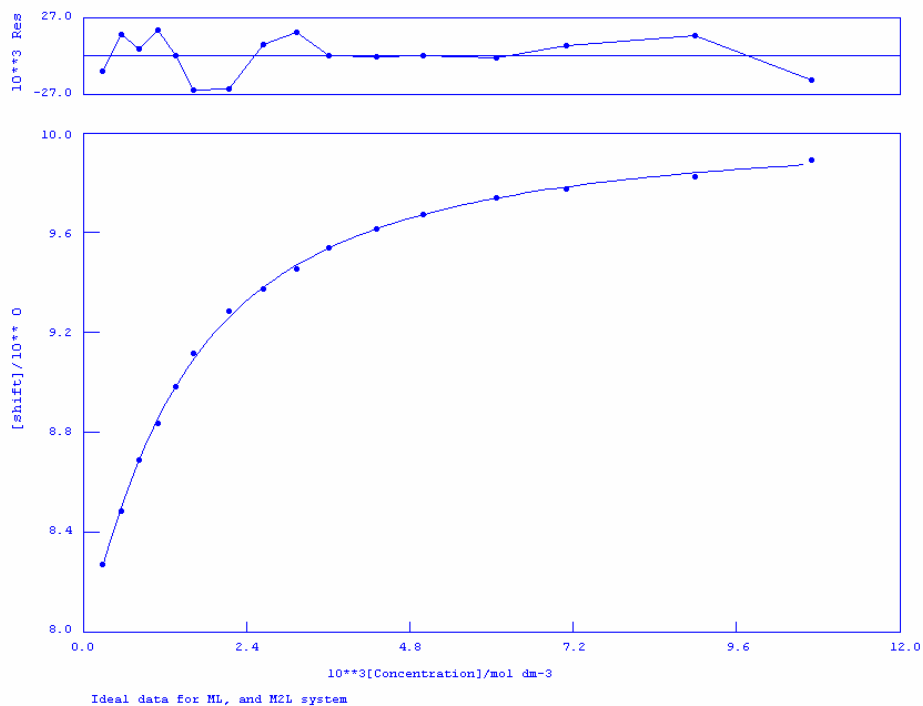

**1b** against  $\text{H}_2\text{PO}_4^-$  1:1 model

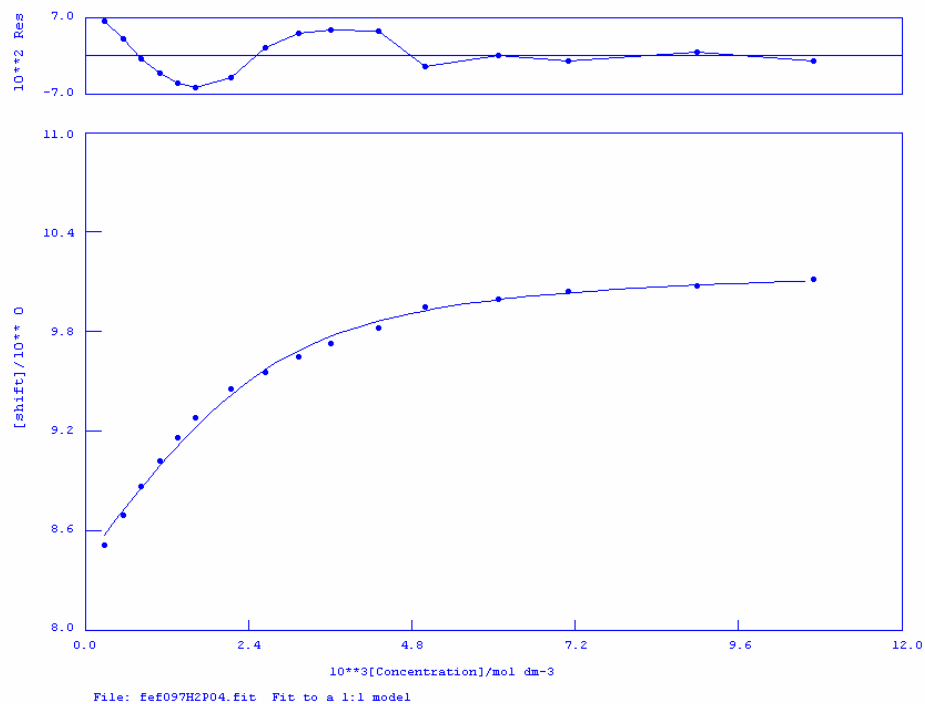

**2** against  $\text{H}_2\text{PO}_4^-$  1:1 model

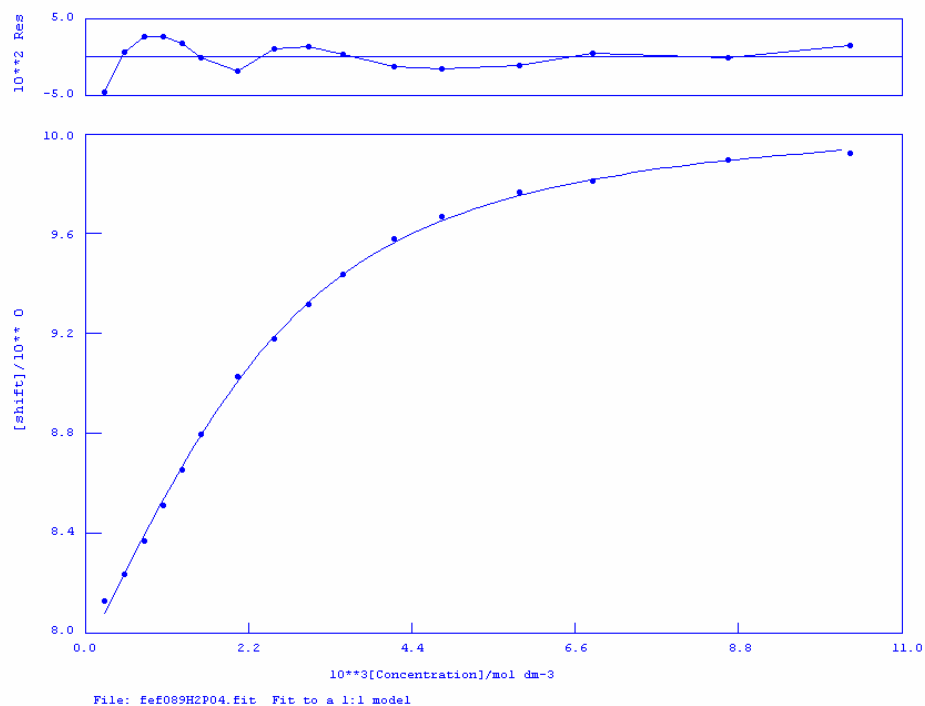

**1a** against dihydrogenpyrophosphate 2:1 model

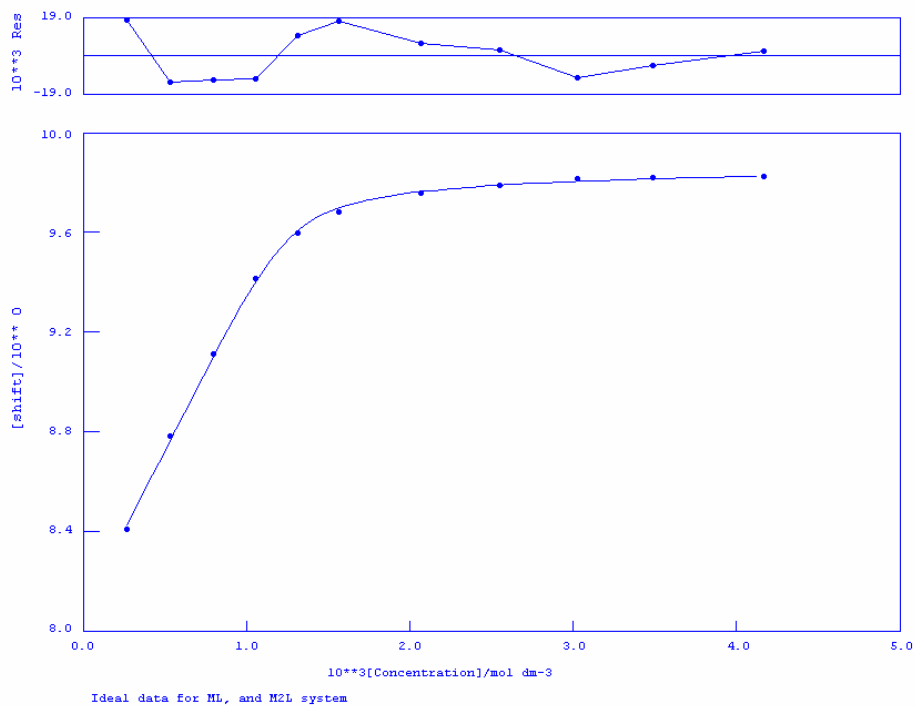

**1b** against dihydrogenpyrophosphate 2:1 model

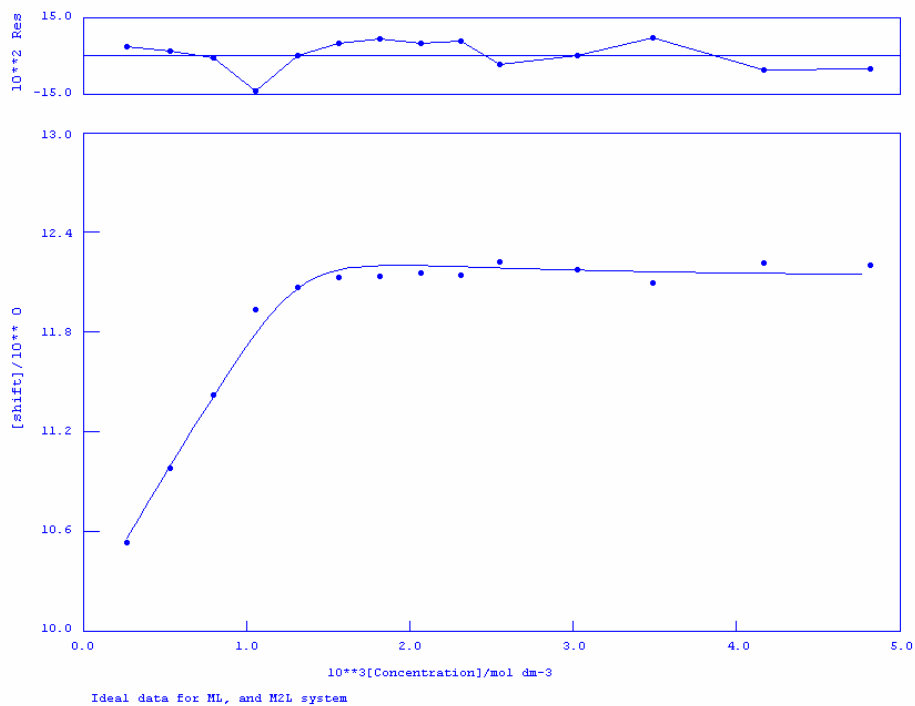

1. M. Hynes, *J. Chem. Soc. Dalton Trans.*, **1993**, 311.
